# Supplementary material
Source: PubMed Central journal article supplement (PMC7895332)
Supplement: NIHMS1669113-supplement-Supplement.pdf [file NIHMS1669113-supplement-Supplement.pdf]

## ONLINE SUPPLEMENT

### **HEPA filtration improves asthma control in children exposed to traffic-related airborne particles**

Christine James MD<sup>1</sup>, David I. Bernstein MD<sup>1</sup>, Jennie Cox PhD<sup>2</sup>, Patrick Ryan PhD<sup>3</sup>, Christopher Wolfe MS<sup>3</sup>, Roman Jandarov PhD<sup>2</sup>, Nicholas Newman DO<sup>3</sup>, Reshmi Indugula MS<sup>2</sup>, Tiina Reponen PhD<sup>2</sup>

<sup>1</sup>Department of Internal Medicine, Division of Immunology, Rheumatology, and Allergy,  
University of Cincinnati College of Medicine, Cincinnati, OH, USA

<sup>2</sup>Department of Environmental Health, University of Cincinnati, Cincinnati, OH, USA

<sup>3</sup>Cincinnati Children's Hospital Medical Center, Cincinnati, OH, USA

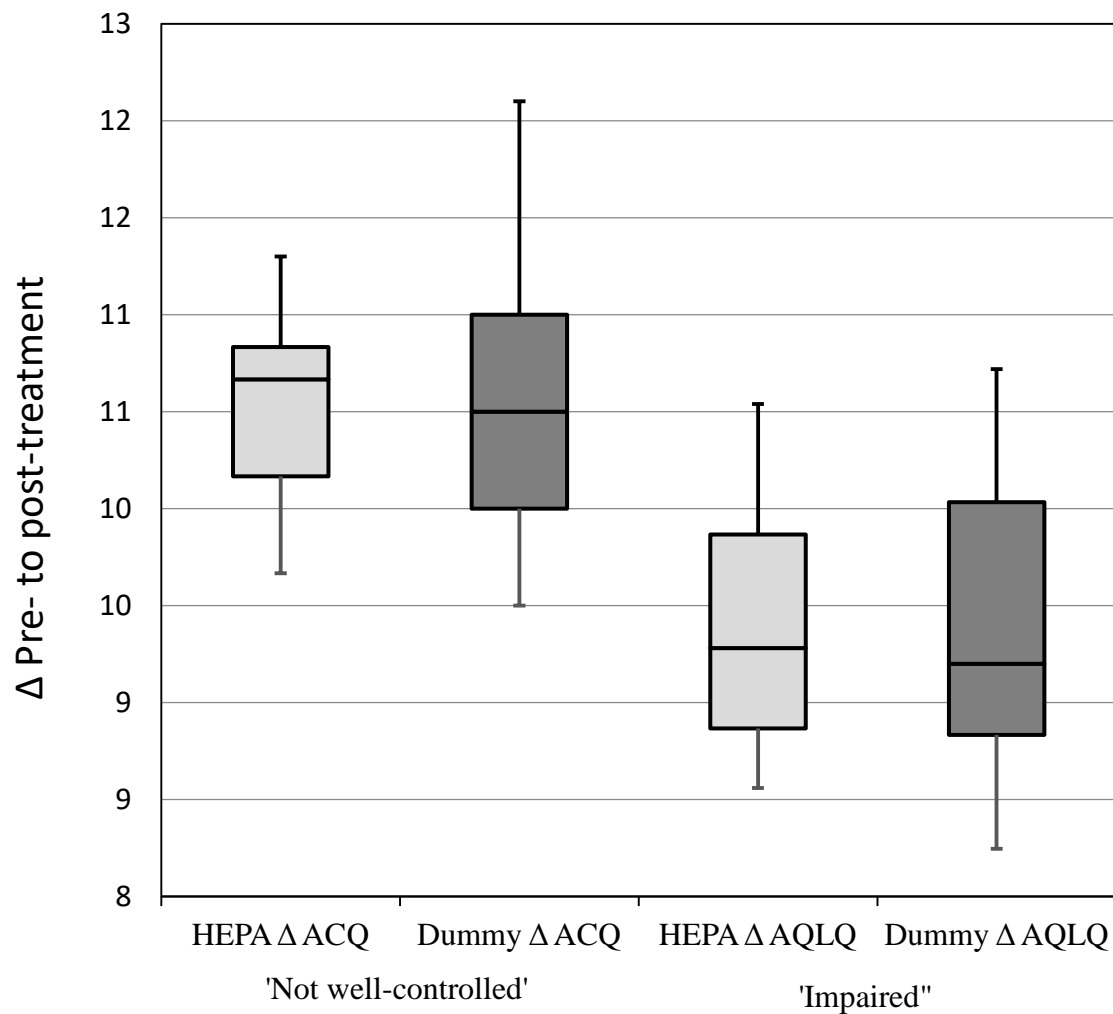

**Figure S1. Changes between pre- to post-treatment in ‘not well-controlled’ ACQ scores and ‘impaired’ quality of life AQLQ scores for HEPA and ‘dummy’ treatments (HEPA ACQ n=20; Dummy ACQ n=19; HEPA AQLQ n=13; Dummy AQLQ n=10).** Horizontal lines in the box plots represent the minimum, 25%, 50%, 75% percentiles, and maximum. ACQ - asthma control questionnaire; AQLQ - asthma quality of life questionnaire. \*\*Due to Bonferroni adjustment, p-value <0.025 was considered significant for Mann-Whitney test

**Table S1. Wilcoxon signed rank test for median baseline and treatments for 'not well-controlled' and 'impaired' quality of life**

| 'Not well-controlled' asthma (ACQ) | HEPA             | Dummy         | 'Impaired' quality of life (AQLQ) | HEPA           | Dummy   |
|------------------------------------|------------------|---------------|-----------------------------------|----------------|---------|
|                                    | p-value          | p-value       |                                   | p-value        | p-value |
| Smoking in home (n=5/6)§           | 0.44             | 0.16          | Smoking in home (n=3)             | 0.25           | 0.25    |
| No smoking in home (n=15/13)       | <b>0.0047*</b>   | 0.074         | No smoking in home (n=10/7)       | 0.064          | 0.50    |
| Male (n=13/12)                     | <b>p=0.0017*</b> | <b>0.023*</b> | Male (n=9/5)                      | <b>0.0039*</b> | 0.11    |
| Female (n=7)                       | p=0.83           | 0.50          | Female (n=4/5)                    | 0.88           | 0.50    |
| Inhaled corticosteroids (n=8/7)    | <b>0.0078*</b>   | 0.21          | Inhaled corticosteroids (n=7/4)   | <b>0.022*</b>  | 0.18    |
| No inhaled corticosteroids (n=12)  | 0.083            | 0.074         | No inhaled corticosteroids (n=6)  | 0.31           | 0.50    |
| Allergy medicine (n=5/6)           | 0.063            | 0.21          | Allergy medicine (n=5/2)          | 0.058          | 1.00    |
| No allergy medicine (n=15/13)      | <b>0.022*</b>    | 0.064         | No allergy medicine (n=8)         | 0.20           | 0.092   |

§number of homes for HEPA/Dummy \*p-value<0.025; ACQ - asthma control questionnaire; AQLQ - asthma quality of life questionnaire

**Table S2. Average and range of ACQ and AQLQ during each season and Kruskal-Wallis rank sum test**

|                                         | Spring           | Summer           | Fall             | Winter           | p-value |
|-----------------------------------------|------------------|------------------|------------------|------------------|---------|
| ACQ (n=21/23/19/21)                     | 0.60 (0.00-1.67) | 0.65 (0.00-2.00) | 0.68 (0.00-1.83) | 0.78 (0.00-2.00) | 0.74    |
| 'Not well-controlled' ACQ (n=11/9/11/8) | 0.83 (0.00-1.67) | 1.15 (0.17-2.00) | 0.91 (.33-1.83)  | 1.17 (0.00-2.00) | 0.41    |
| AQLQ (n=20/23/19/22)                    | 6.20 (4.93-7.00) | 5.98 (3.50-7.00) | 6.23 (4.00-7.00) | 6.09 (2.93-6.87) | 0.96    |
| 'Impaired' AQLQ (n=4/6/6/7)             | 5.53 (5.33-5.93) | 4.68 (3.50-6.27) | 5.57 (4.00-6.40) | 5.32 (2.93-6.67) | 0.37    |

\*\*p-value<0.0125; ACQ - asthma control questionnaire; AQLQ - asthma quality of life questionnaire
